# Supplementary material for: Beclin 1 of megakaryocytic lineage cells is locally dispensable for platelet hemostasis but functions distally in bone homeostasis
Source: Springer Nature journal article supplement (doi:10.1038/s41413-025-00410-7), 2025-03-03
Supplement: MOESM1 [file 41413_2025_410_MOESM1_ESM.pdf]

## Supplementary material

### Beclin 1 of megakaryocyte lineage cells is locally dispensable for platelet hemostasis but functions distally in bone homeostasis

Lei Li<sup>1,2,4,#</sup>, Chen Zhao<sup>1,2,#</sup>, Ruizhi Zhang<sup>3,#</sup>, Wen Wei<sup>1,2,4</sup>, Bowen Liu<sup>1,2</sup>, Jin Dong<sup>1,2</sup>, Xueqin Gao<sup>1,2</sup>, Di Zhang<sup>1,2</sup>, Xueqing Wang<sup>1,2</sup>, Meilin Lu<sup>1,2</sup>, Yumu Zhang<sup>1,2</sup>, Yao Yu<sup>1,2</sup>, Na Yuan<sup>1,2,4</sup>, Youjia Xu<sup>3,\*</sup>, Jianrong Wang<sup>1,2,4,\*</sup> and Yixuan Fang<sup>1,2,4,\*</sup>

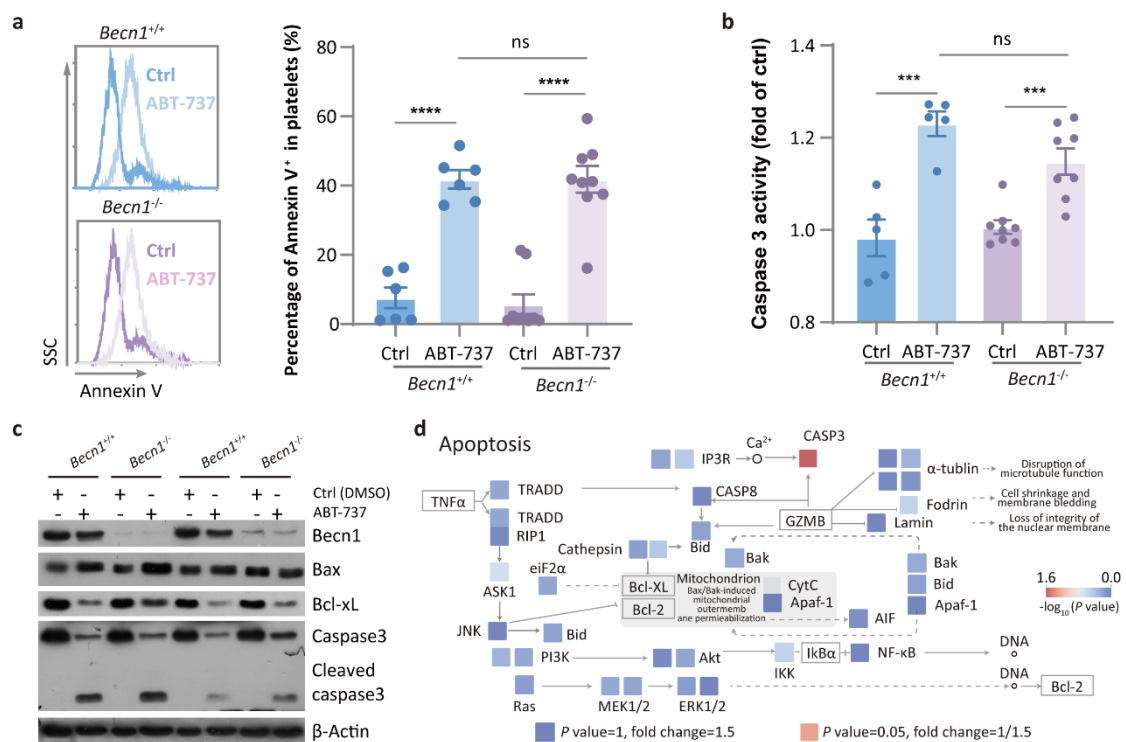

**Figure S1. Pf4-Cre-mediated *Becn1* deletion does not increase apoptosis of platelets. (a)** Flow cytometric analysis of platelet apoptosis after DMSO or ABT-737 treatment. **(b)** Spectrophotometric analysis of caspase 3 activity in platelets after DMSO or ABT-737 treatment. **(c)** Western blot analysis of proapoptotic or antiapoptotic proteins in platelets treated with DMSO or ABT-737.  $\beta$ -Actin was used as a loading control. **(d)** The proteins identified in the platelet proteome. The signaling pathway utilized in this study was adapted from the KEGG pathway mmu04210. The size of each node in the network was scaled to represent the magnitude of protein expression change in *Becn1*<sup>+/+</sup> and *Becn1*<sup>+/+</sup>;Pf4-iCre mice. Furthermore, the color bar indicates the  $-\log_{10}(P \text{ value})$ , which reflects the statistical significance of the differences between the two groups. Data are mean  $\pm$  SEM. \*\*\*P < 0.001; \*\*\*\*P < 0.0001.

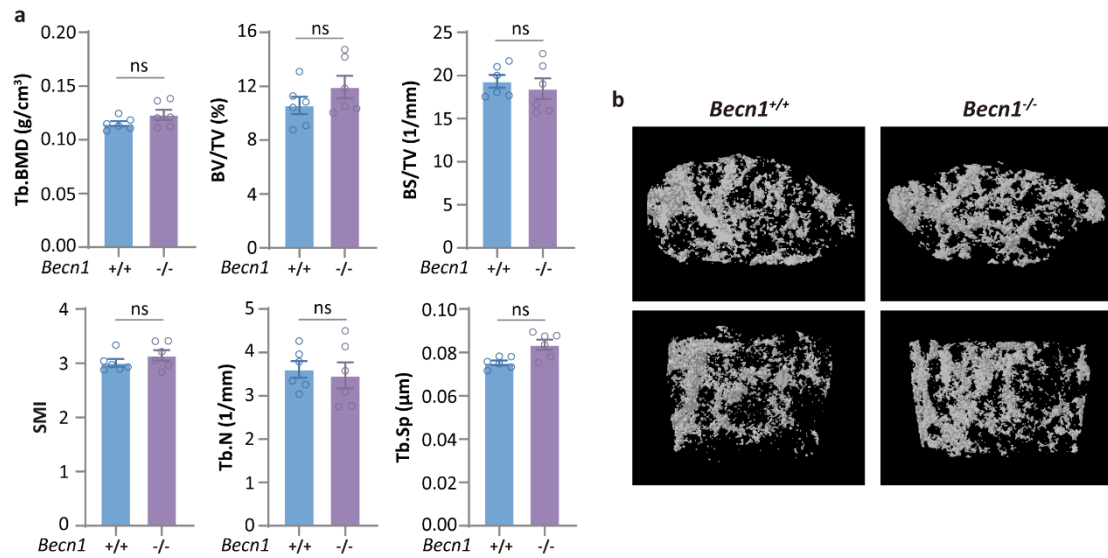

**Figure S2. Micro-CT scanning of the femur trabecular and cortical bones of female *Becn1*<sup>f/f</sup>;Pf4-iCre mice did not reveal any significant increase in bone mass. (a) Micro-CT analysis of female *Becn1*<sup>f/f</sup> and *Becn1*<sup>f/f</sup>;Pf4-iCre mice. (b) Three-dimensional reconstructions of female *Becn1*<sup>f/f</sup> and *Becn1*<sup>f/f</sup>;Pf4-iCre mice. The data are the mean ± SEM.**

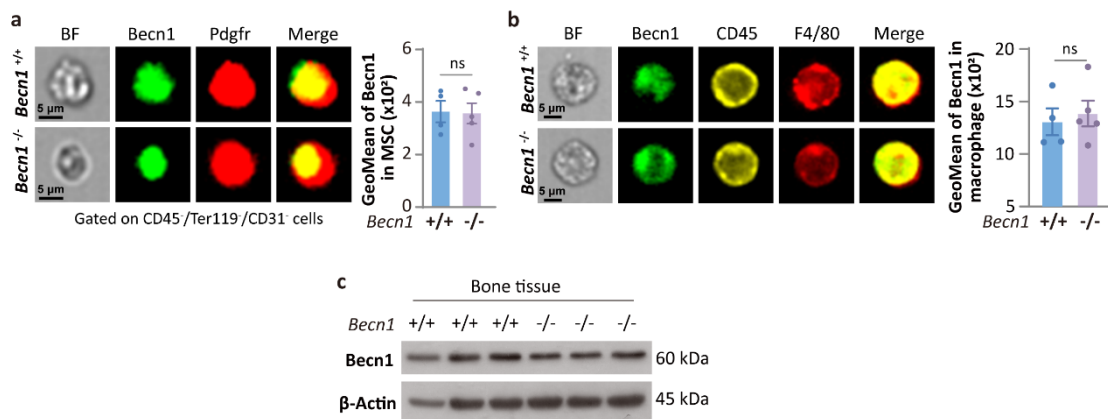

**Figure S3. No significant changes in *Becn1* were observed in mesenchymal stem cells, macrophages, and bone tissue of *Becn1*<sup>f/f</sup> and *Becn1*<sup>f/f</sup>;Pf4-iCre mice. (a-b) Analysis of *Becn1* expression (green) in bone tissue progenitor cells (MSCs, macrophages) was conducted using imaging flow cytometry in *Becn1*<sup>f/f</sup> and *Becn1*<sup>f/f</sup>;Pf4-iCre mice. Left panel, representative flow image; right, results of flow image analysis. (c) Western blot analysis of *Becn1* expression in bone tissue. The data are the mean ± SEM.**

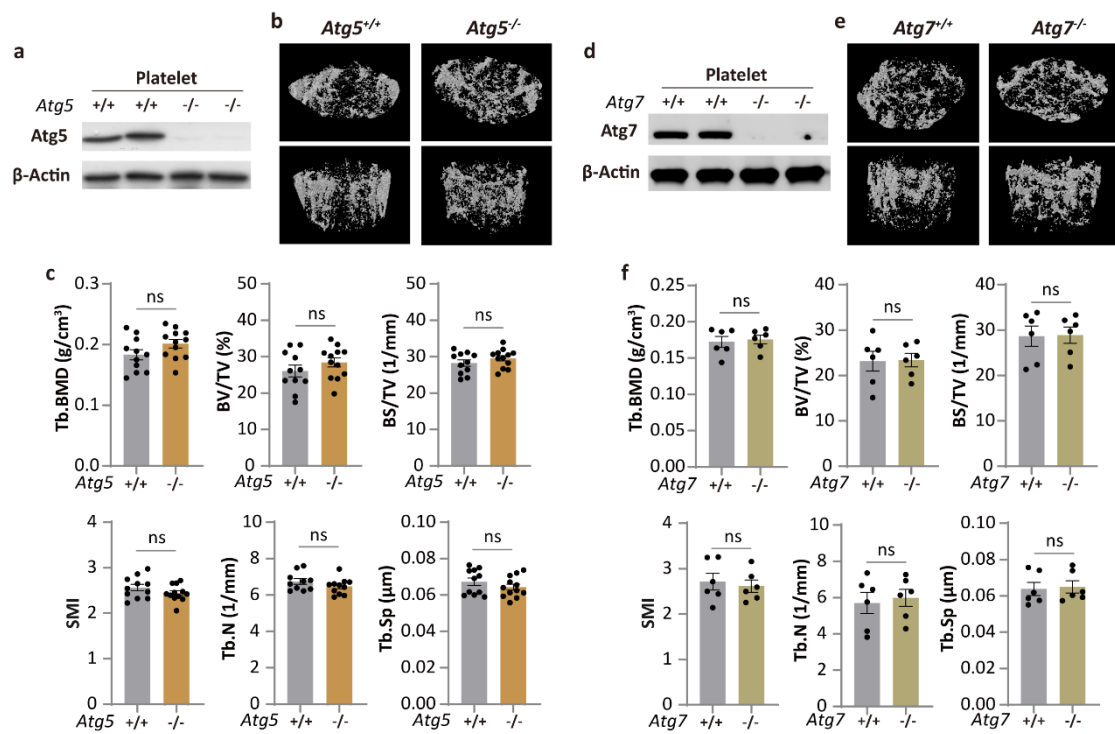

**Figure S4. The loss of Atg5 or Atg7 in the megakaryocytic lineage does not affect bone mass.** (a) Analysis of the Atg5 protein expression level in platelets by Western blotting. β-actin was used as a loading control. (b-c) Micro-CT analysis of the *Atg5*<sup>f/f</sup> and *Atg5*<sup>f/f</sup>;Pf4-iCre mice. (d) Analysis of the Atg7 protein expression level in platelets by western blotting. β-actin was used as a loading control. (e-f) Micro-CT analysis of the *Atg7*<sup>f/f</sup> and *Atg7*<sup>f/f</sup>;Pf4-iCre mice. The data are the mean ± SEM.

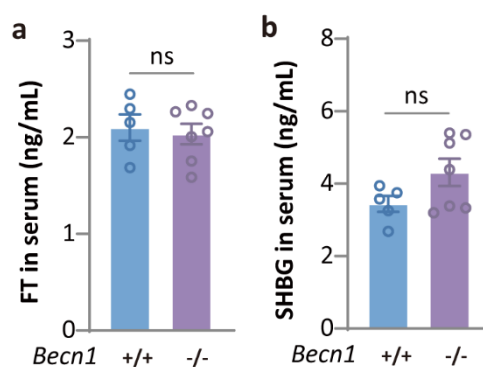

**Figure S5. Deletion of *Becn1* in megakaryocytic lineage cells does not affect the levels of free testosterone and SHBG in the serum of female mice.** (a) ELISA was performed to detect the levels of FT in the serum of female *Becn1*<sup>f/f</sup> and *Becn1*<sup>f/f</sup>;Pf4-iCre mice. (b) ELISA was performed to detect the levels of SHBG in the serum of female *Becn1*<sup>f/f</sup> and *Becn1*<sup>f/f</sup>;Pf4-iCre mice. The data are the mean ± SEM.

**Table S1. Reagents used in this study**

| <b>Reagent</b>                                             | <b>Brand</b>      | <b>Catalog</b> |
|------------------------------------------------------------|-------------------|----------------|
| Thrombin                                                   | Chrono-log        | P/N386         |
| Prostaglandin E1                                           | Enzo Life Science | GH0136         |
| Hoechst                                                    | Invitrogen        | H3570          |
| Fibrinogen                                                 | Sigma             | F3879          |
| Alexa 594-conjugated phalloidin                            | Abcam             | A12381         |
| FITC anti-mouse CD2 Antibody                               | Biolegend         | 100105         |
| FITC anti-mouse CD3 Antibody                               | Biolegend         | 100204         |
| FITC anti-mouse CD5 Antibody                               | Biolegend         | 100606         |
| FITC anti-mouse CD8a Antibody                              | Biolegend         | 100706         |
| FITC anti-mouse TER-119/Erythroid Cells Antibody           | Biolegend         | 116205         |
| FITC anti-mouse Ly-6G/Ly-6C (Gr-1) Antibody                | Biolegend         | 108406         |
| FITC anti-mouse/human CD45R/B220 Antibody                  | Biolegend         | 103206         |
| APC anti-mouse CD41 Antibody                               | Biolegend         | 133914         |
| BD Horizon™ BV421 Rat anti-Mouse CD150                     | BD Biosciences    | 562811         |
| Ly-6A/E (Sca-1) Monoclonal Antibody (D7), PerCP-Cyanine5.5 | Invitrogen        | 45598182       |
| CD117 (c-Kit) Monoclonal Antibody (2B8), PE                | Invitrogen        | 12117182       |
| CD45 Monoclonal Antibody (30-F11), PE-Cyanine7             | Invitrogen        | 25045181       |
| PE anti-Streptavidin Antibody                              | Biolegend         | 410504         |
| FITC anti-mouse F4/80 Antibody                             | Biolegend         | 123108         |
| Collagenase                                                | Sigma             | C2674          |
| Dispase II                                                 | Sigma             | D4693          |
| Deoxyribonuclease I                                        | Sigma             | D5025          |
| ABT-737                                                    | Selleck           | S1002          |
| BD Pharmingen™ FITC Annexin V                              | BD Biosciences    | 556419         |
| Caspase-3 Assay Kit -Colorimetric                          | DOJINDO           | C551           |

|                                   |        |           |
|-----------------------------------|--------|-----------|
| Beclin-1 (D40C5) Rabbit mAb       | CST    | 3495S     |
| Bax Antibody                      | CST    | 2772T     |
| Bcl-xL (54H6) Rabbit mAb          | CST    | 2764S     |
| Caspase-3 Antibody                | CST    | 9662S     |
| Biotin N-hydroxysuccinimide ester | Sigma  | h1759     |
| Polyinosinic-Polycytidylic acid   | Sigma  | P0913     |
| SHBG Antibody                     | HuaBio | ER1903-18 |
| Atg5 Antibody                     | HuaBio | ET1611-38 |
| Atg7 Antibody                     | HuaBio | ET1610-53 |
| β-Actin Antibody                  | CST    | 4970T     |
